# Supplementary material for: A mutation update on the LDS‐associated genes TGFB2/3 and SMAD2/3
Source: PubMed Central journal article supplement (PMC5947146; doi:10.1002/humu.23407), 2018-03-06
Supplement: HUMU-39-621-s001.pdf [file HUMU-39-621-s001.pdf]

**Supplementary Table S1:** Pathogenicity classification of all *SMAD2/3* and *TGFB2/3* variants described in this paper according to the ACMG guidelines. Evidence is provided by the criteria defined by Richards et al., 2015

| Gene         | c-notation                | p-notation       | Effect                  | Evidence                         |
|--------------|---------------------------|------------------|-------------------------|----------------------------------|
| <i>SMAD2</i> | c.954T>A                  | p.Asn318Lys      | Likely pathogenic (V)   | PM2, PP3, PP2, PP1-M             |
| <i>SMAD2</i> | c.1082A>C                 | p.Asn361Thr      | Likely pathogenic (V)   | PM2, PP3, PP2, PP1-M             |
| <i>SMAD2</i> | c.1163A>G                 | p.Gln388Arg      | Likely pathogenic (III) | PP3, PS3, PP2                    |
| <i>SMAD2</i> | c.1190C>A                 | p.Ser397Tyr      | Likely pathogenic (II)  | PM2, PP3, PP2, PP1-S             |
| <i>SMAD2</i> | c.1346T>C                 | p.Leu449Ser      | Likely pathogenic (V)   | PM2, PP3, PP2, PP1-M             |
| <i>SMAD2</i> | c.1369G>A                 | p.Gly457Arg      | Likely pathogenic (II)  | PM2, PP3, PP2, PS2               |
| <i>SMAD2</i> | c.1400C>T                 | p.Ser467Leu      | VUS                     | PM2, PP3, PP2                    |
| <i>SMAD3</i> | c.2T>C                    | p.Met1Thr        | Pathogenic (Ic)         | PM2, PVS1, PP2                   |
| <i>SMAD3</i> | c.3G>A                    | p.Met1Ile        | Pathogenic (Ic)         | PM2, PVS1, PP2                   |
| <i>SMAD3</i> | c.221G>A                  | p.Arg74Gln       | Likely pathogenic (V)   | PM2, PM5, PP2, PP1, PP4          |
| <i>SMAD3</i> | c.266G>A                  | p.Cys89Tyr       | Pathogenic (IIIb)       | PM2, PP2, PP1-S, PP1-M, PP1, PP4 |
| <i>SMAD3</i> | c.269G>A                  | p.Arg90His       | Likely pathogenic (V)   | PM2, PP2, PP1, PP1-M, PP4        |
| <i>SMAD3</i> | c.281G>T                  | p.Trp94Leu       | VUS                     | PM2, PP2, PP1, PP4               |
| <i>SMAD3</i> | c.290T>G                  | p.Leu97Arg       | VUS                     | PM2, PP2, PP4                    |
| <i>SMAD3</i> | c.300_301insAGGGCCGGCAGGC | p.His101Argfs*14 | Pathogenic (Ic)         | PM2, PVS1, PP4                   |
| <i>SMAD3</i> | c.313delG                 | p.Ala105Profs*11 | Pathogenic (Ic)         | PM2, PVS1, PP4                   |
| <i>SMAD3</i> | c.335C>T                  | p.Ala112Val      | Likely pathogenic (V)   | PM2, PP2, PP1-M, PP4             |
| <i>SMAD3</i> | c.370C>A                  | p.Pro124Thr      | VUS                     | PM2, PP2, PP5, PP4               |
| <i>SMAD3</i> | c.374A>G                  | p.Tyr125Cys      | Likely pathogenic (V)   | PM2, PM5, PP2, PP4               |
| <i>SMAD3</i> | c.374A>C                  | p.Tyr125Ser      | Likely pathogenic (V)   | PM2, PM5, PP2, PP4               |
| <i>SMAD3</i> | c.401-6G>A                | p.Val134Aspfs*33 | Pathogenic (Ia)         | PM2, PVS1, PS1, PP4              |
| <i>SMAD3</i> | c.401_405dup              | p.Pro136Phefs*52 | Pathogenic (Ic)         | PM2, PVS1, PP4                   |
| <i>SMAD3</i> | c.455delC                 | p.Pro152Hisfs*34 | Pathogenic (Ic)         | PM2, PVS1, PP4                   |
| <i>SMAD3</i> | c.511G>T                  | p.Glu171*        | Pathogenic (Ic)         | PM2, PVS1, PP4                   |
| <i>SMAD3</i> | c.532+1G>C                |                  | Pathogenic (Ic)         | PM2, PVS1, PP4                   |
| <i>SMAD3</i> | c.539_540insC             | p.Pro180Thrfs*7  | Pathogenic (Ia)         | PM2, PVS1, PS1, PP4              |
| <i>SMAD3</i> | c.546delT                 | p.Gly183Alafs*3  | Pathogenic (Ic)         | PM2, PVS1, PP4                   |
| <i>SMAD3</i> | c.584_585insTC            | p.Gln195Hisfs*3  | Pathogenic (Ib)         | PP4, PVS1, PM2, PM4              |
| <i>SMAD3</i> | c.652delA                 | p.Asn218Thrfs*23 | Pathogenic (Ib)         | PM2, PVS1, PM4, PP1-M            |
| <i>SMAD3</i> | c.668delC                 | p.Pro223Glnfs*18 | Pathogenic (Ic)         | PM2, PVS1, PP4                   |
| <i>SMAD3</i> | c.715G>A                  | p.Glu239Lys      | Pathogenic (II)         | PM2, PS1, PP2, PP1-S             |
| <i>SMAD3</i> | c.728G>C                  | p.Arg243Pro      | Likely pathogenic (II)  | PM2, PP2, PP3, PP1-S, PP4        |
| <i>SMAD3</i> | c.733G>A                  | p.Gly245Arg      | Likely pathogenic (VI)  | PM2, PP3, PP5, PP4, PP2          |
| <i>SMAD3</i> | c.741_742delAT            | p.Thr247Profs*61 | Pathogenic (Ic)         | PM2, PVS1, PP4                   |
| <i>SMAD3</i> | c.742T>C                  | p.Phe248Leu      | Likely pathogenic (VI)  | PM2, PP3, PP2, PP4, PP5          |
| <i>SMAD3</i> | c.748G>A                  | p.Ala250Thr      | Likely pathogenic (II)  | PM2, PP3, PP2, PP1-S             |
| <i>SMAD3</i> | c.762delC                 | p.Met255*        | Pathogenic (Id)         | PM2, PVS1, PP4, PP5              |
| <i>SMAD3</i> | c.772G>C                  | p.Asp258His      | Likely pathogenic (VI)  | PM2, PP2, PP5, PP4, PP3          |
| <i>SMAD3</i> | c.782C>T                  | p.Thr261Ile      | Pathogenic (IIIc)       | PM2, PP3, PP2, PP5, PP1-S, PP4   |
| <i>SMAD3</i> | c.788C>T                  | p.Pro263Leu      | VUS                     | PM2, PP3, PP2, PP4               |
| <i>SMAD3</i> | c.797C>A                  | p.Ser266*        | Pathogenic (Ic)         | PM2, PVS1, PP4                   |
| <i>SMAD3</i> | c.803G>T                  | p.Arg268Leu      | Likely pathogenic (II)  | PM2, PS1, PP3, PP2, PP4          |
| <i>SMAD3</i> | c.836G>A                  | p.Arg279Lys      | Likely pathogenic (VI)  | PM2, PP3, PP2, PP1, PP4          |
| <i>SMAD3</i> | c.859C>T                  | p.Arg287Trp      | Likely pathogenic (II)  | PM2, PS1, PP3, PP2, PP4          |
| <i>SMAD3</i> | c.860G>A                  | p.Arg287Gln      | Likely pathogenic (II)  | PM2, PS1, PM5, PP3               |
| <i>SMAD3</i> | c.861delG                 | p.Arg288Aspfs*53 | Pathogenic (Id)         | PM2, PVS1, PP3, PP2              |
| <i>SMAD3</i> | c.862_871+1dupAGACACATCGG | p.Arg292Aspfs*53 | Pathogenic (Ic)         | PM2, PVS1, PP3                   |
| <i>SMAD3</i> | c.887T>C                  | p.Leu296Pro      | Likely pathogenic (V)   | PM2, PP3, PP2, PP1-M             |
| <i>SMAD3</i> | c.988A>G                  | p.Thr330Ala      | Likely pathogenic (VI)  | PM2, PP3, PP1, PP4, PP2          |
| <i>SMAD3</i> | c.1009+1G>A               |                  | Pathogenic (Ic)         | PM2, PVS1, PP3                   |
| <i>SMAD3</i> | c.1009+2T>A               |                  | Pathogenic (Ic)         | PM2, PVS1, PP3                   |
| <i>SMAD3</i> | c.1045G>C                 | p.Ala349Pro      | Likely pathogenic (V)   | PM2, PP3, PP2, PP1-M             |
| <i>SMAD3</i> | c.1080dupT                | p.Glu361*        | Pathogenic (Ia)         | PM2, PVS1, PP3, PS1              |
| <i>SMAD3</i> | c.1081G>T                 | p.Glu361*        | Pathogenic (Ia)         | PM2, PVS1, PS1                   |
| <i>SMAD3</i> | c.1091A>G                 | p.Tyr364Cys      | Likely pathogenic (VI)  | PM2, PP3, PP2, PP1, PP4          |

|              |                                                                            |                    |                         |                                |
|--------------|----------------------------------------------------------------------------|--------------------|-------------------------|--------------------------------|
| <b>SMAD3</b> | c.1102C>T                                                                  | p.Arg368*          | Pathogenic (Ia)         | PM2, PVS1, PS1                 |
| <b>SMAD3</b> | c.1141G>C                                                                  | p.Gly381Arg        | Likely pathogenic (V)   | PM2, PP3, PP2, PP1-M           |
| <b>SMAD3</b> | c.1155-2A>G                                                                |                    | Pathogenic (Ic)         | PM2, PVS1, PP3                 |
| <b>SMAD3</b> | c.1170_1179del                                                             | p.Ser391Alafs*7    | Pathogenic (Ic)         | PM2, PVS1, PP3                 |
| <b>SMAD3</b> | c.1179_1180dupC                                                            | p.Cys394Leufs*4    | Pathogenic (Ic)         | PM2, PP3, PVS1                 |
| <b>SMAD3</b> | c.1185G>C                                                                  | p.Trp395Cys        | VUS                     | PM2, PP3, PP2                  |
| <b>SMAD3</b> | c.1199T>C                                                                  | p.Leu400Pro        | VUS                     | PM2, PP3, PP2                  |
| <b>SMAD3</b> | c.1208C>T                                                                  | p.Pro403Leu        | Likely pathogenic (II)  | PM2, PP3, PP2, PS2             |
| <b>SMAD3</b> | c.1222G>C                                                                  | p.Asp408His        | Likely pathogenic (V)   | PM2, PM5, PP3, PP2             |
| <b>SMAD3</b> | c.1224C>A                                                                  | p.Asp408Glu        | Likely pathogenic (V)   | PM2, PP3, PM5, PP2             |
| <b>SMAD3</b> | c.1243G>C                                                                  | p.Gly415Arg        | Likely pathogenic (V)   | PM2, PP3, PP2, PP1-M           |
| <b>SMAD3</b> | c.1247C>T                                                                  | p.Ser416Phe        | Likely pathogenic (V)   | PM2, PP3, PP2, PP1-M           |
| <b>SMAD3</b> | c.1259G>A                                                                  | p.Arg420His        | VUS                     | PP3, PP2                       |
| <b>SMAD3</b> | c.1265C>T                                                                  | p.Ser422Phe        | Likely pathogenic (II)  | PM2, PP3, PP2, PP1-S           |
| <b>SMAD3</b> | c.1267A>G                                                                  | p.Ser423Gly        | Likely pathogenic (V)   | PM2, PP3, PP2, PP1-M           |
| <b>SMAD3</b> | c.1268G>A                                                                  | p.Ser423Asn        | Likely pathogenic (II)  | PM2, PP3, PP2, PS2             |
| <b>SMAD3</b> | c.1274C>T                                                                  | p.Ser425Phe        | VUS                     | PM2, PP3, PP2                  |
| <b>SMAD3</b> | Deletion from exon 2 onwards: Chr2.hg19:<br>g.(67,408,242)_(67,603,013)del |                    | Pathogenic (Ic)         | PVS1, PP3, PM2                 |
| <b>SMAD3</b> | Deletion 15q22.33                                                          |                    | Pathogenic (Ic)         | PM2, PVS1, PP3                 |
| <b>TGFB2</b> | c.236A>T                                                                   | p.Gln79Leu         | Likely pathogenic (VI)  | PM2, PP3, PP2, PP1, PP4        |
| <b>TGFB2</b> | c.244G>T                                                                   | p.Ala82Ser         | VUS                     | PM2, PP3, PP2, PP4             |
| <b>TGFB2</b> | c.274G>T                                                                   | p.Glu92*           | Pathogenic (Ic)         | PM2, PVS1, PP1                 |
| <b>TGFB2</b> | c.294_308delCTACGCCA<br>AGGAGGT                                            | p.Ala100_Tyr104del | Likely pathogenic (V)   | PM2, PP3, PM4, PP1, PP4        |
| <b>TGFB2</b> | c.297 >A                                                                   | p.Tyr99*           | Pathogenic (Id)         | PM2, PVS1, PP3, PP1, PP4       |
| <b>TGFB2</b> | c.304G>T                                                                   | p.Glu102*          | Pathogenic (Id)         | PM2, PVS1, PP3, PP1, PP4       |
| <b>TGFB2</b> | c.305_307delAGG                                                            | p.Glu102del        | Likely pathogenic (V)   | PM2, PM4, PP3, PP1, PP4        |
| <b>TGFB2</b> | c.475C>T                                                                   | p.Arg159*          | Pathogenic (Ia)         | PM2, PVS1, PS1, PP3, PP4       |
| <b>TGFB2</b> | c.518_519 insT                                                             | p.Lys174Glufs*18   | Pathogenic (Id)         | PM2, PVS1, PP3, PP4            |
| <b>TGFB2</b> | c.577C>T                                                                   | p.Arg193Trp        | Likely pathogenic (III) | PP3, PP2, PP1-S, PP4           |
| <b>TGFB2</b> | c.673G>T                                                                   | p.Glu225*          | Pathogenic (Id)         | PM2, PVS1, PP3, PP4            |
| <b>TGFB2</b> | c.687C>A                                                                   | p.Cys229*          | Pathogenic (Id)         | PM2, PVS1, PP3, PP1, PP4       |
| <b>TGFB2</b> | c.839-1G>A                                                                 | p.Gly280Aspfs*41   | Pathogenic (Id)         | PM2, PVS1, PP3, PP1, PP4       |
| <b>TGFB2</b> | c.873_888dup                                                               | p.Asn297*          | Pathogenic (Id)         | PM2, PVS1, PP3, PP1, PP4       |
| <b>TGFB2</b> | c.979C>T                                                                   | p.Arg327Trp        | Pathogenic (II)         | PM2, PS1, PM5, PP3, PM1, PP1-S |
| <b>TGFB2</b> | c.980G>A                                                                   | p.Arg327Gln        | Pathogenic (IIIa)       | PM2, PS1, PM5, PP3, PM1, PP1   |
| <b>TGFB2</b> | c.988C>T                                                                   | p.Arg330Cys        | Pathogenic (IIIb)       | PM2, PS1, PP3, PM1, PP1        |
| <b>TGFB2</b> | c.1000delG                                                                 | p.Ala334Arg*fs25   | Pathogenic (Ic)         | PM2, PVS1, PP3                 |
| <b>TGFB2</b> | c.1021_1025delTACAA                                                        | p.Tyr341Cysfs*25   | Pathogenic (Id)         | PM2, PVS1, PP3, PP1            |
| <b>TGFB2</b> | c.1042C>T                                                                  | p.Arg348Cys        | Likely pathogenic (V)   | PM2, PP3, PP2, PP1-M           |
| <b>TGFB2</b> | c.1097C>A                                                                  | p.Pro366His        | Likely pathogenic (V)   | PM2, PP3, PP2, PP1-M           |
| <b>TGFB2</b> | c.1106_1110delACAAT                                                        | p.Tyr369Cysfs*26   | Pathogenic (Ia)         | PM2, PVS1, PP3, PP1-S          |
| <b>TGFB2</b> | c.1125delT                                                                 | p.Gly376Glufs*17   | Pathogenic (Ic)         | PM2, PVS1, PP3                 |
| <b>TGFB2</b> | c.1165dupA                                                                 | p.Ser389Lysfs*8    | Pathogenic (Ib)         | PM2, PVS1, PP3, PP1-M          |
| <b>TGFB2</b> | c.1170+1G>A                                                                |                    | Pathogenic (Id)         | PM2, PVS1, PP3, PP1            |
| <b>TGFB2</b> | c.1234G>C                                                                  | p.Asp412His        | VUS                     | PM2, PP3, PP2, PP4             |
| <b>TGFB2</b> | Entire gene Chr1.hg19:<br>g.(215,588,712)_(222,145,072)del                 |                    | Pathogenic (Ia)         | PM2, PVS1, PS2                 |
| <b>TGFB2</b> | Entire gene Chr1.hg19:<br>g.(216,672,181)_(220,202,575)del                 |                    | Pathogenic (Ia)         | PM2, PVS1, PS2                 |
| <b>TGFB2</b> | Entire gene Chr1.hg19:<br>g.(214,271,966)_(219,506,825)del                 |                    | Pathogenic (Ia)         | PM2, PVS1, PP3, PS2            |
| <b>TGFB2</b> | Entire gene Chr1.hg19:<br>g.(215,713,272)_(218,899,968)del                 |                    | Pathogenic (Ia)         | PM2, PVS1, PS2                 |
| <b>TGFB3</b> | c.106A>T                                                                   | p.Lys36*           | Pathogenic (Ic)         | PM2, PVS1, PP3                 |
| <b>TGFB3</b> | c.437delT                                                                  | p.Leu146Hisfs*68   | Pathogenic (Ic)         | PM2, PVS1, PP3                 |
| <b>TGFB3</b> | c.704delA                                                                  | p.Asn235Metfs*11   | Pathogenic (Id)         | PM2, PVS1, PP3, PP1            |
| <b>TGFB3</b> | c.754+2T>C                                                                 | p.Glu216_Lys251del | Pathogenic (Id)         | PM2, PVS1, PP3, PP1            |
| <b>TGFB3</b> | c.787G>C                                                                   | p.Asp263His        | Likely pathogenic (II)  | PM2, PP3, PS1, PP2, PP1        |

|              |            |                  |                        |                              |
|--------------|------------|------------------|------------------------|------------------------------|
| <b>TGFB3</b> | c.796C>T   | p.Arg266Cys      | VUS                    | PM2, PP3, PP1                |
| <b>TGFB3</b> | c.898C>T   | p.Arg300Trp      | Pathogenic (IIIb)      | PM2, PP3, PS1, PP2, PP1-M    |
| <b>TGFB3</b> | c.899G>A   | p.Arg300Gln      | Pathogenic (IIIa)      | PM2, PS1, PP3, PM5, PM1      |
| <b>TGFB3</b> | c.898C>G   | p.Arg300Gly      | Likely pathogenic (IV) | PM2, PM5, PP3, PM1, PP2, PP1 |
| <b>TGFB3</b> | c.965T>C   | p.Ile322Thr      | Likely pathogenic (V)  | PP3, PP2, PM1, PP1-M, PP1    |
| <b>TGFB3</b> | c.979G>T   | p.Asp327Tyr      | Likely pathogenic (V)  | PP3, PP2, PM1, PP1-M, PP1    |
| <b>TGFB3</b> | c.1095C>A  | p.Tyr365*        | Pathogenic (Ia)        | PM2, PVS1, PP3, PM1, PS2     |
| <b>TGFB3</b> | c.1157delT | p.Leu386Argfs*21 | Pathogenic (Ic)        | PM2, PVS1, PP3               |
| <b>TGFB3</b> | c.1202T>C  | p.Leu401Pro      | Likely pathogenic (IV) | PM2, PM5, PP3, PM1, PP2      |
| <b>TGFB3</b> | c.1226G>A  | p.Cys409Tyr      | Pathogenic (IIIb)      | PM2, PP3, PM1, PP2, PS3      |

VUS = Variant of Unknown Significance
