# Supplementary material for: A mutation update on the LDS‐associated genes TGFB2/3 and SMAD2/3
Source: PubMed Central journal article supplement (PMC5947146; doi:10.1002/humu.23407), 2018-03-06
Supplement: HUMU-39-621-s002.pdf [file HUMU-39-621-s002.pdf]

**Supplementary Table S2:** Comparison of the clinical features between previously reported and newly identified *TGFB2* mutation patients.

|                                 | (Boileau, et al., 2012) | (Lindsay, et al., 2012) | (Renard, et al., 2013) | (Fontana, et al., 2014) | (Leutermann, et al., 2014) | (Ritelli, et al., 2014) | (Gago-Diaz, et al., 2014) | (Schubert, et al., 2016) | Total literature (%) | Total current study (%) |
|---------------------------------|-------------------------|-------------------------|------------------------|-------------------------|----------------------------|-------------------------|---------------------------|--------------------------|----------------------|-------------------------|
| Abnormal uvula                  | 0/13                    | 3/15                    |                        |                         |                            |                         |                           |                          | 3/28 (11)            | 5/28 (18)               |
| Aortic aneurysm                 | 4/10                    | 10/15                   | 4/6                    | 1/1                     | 2/2                        | 0/2                     | 3/3                       | 1/1                      | 25/40 (63)           | 21/33 (64)              |
| Aortic dissection               | 2/19                    | 1/15                    | 2/6                    |                         | 0/3                        | 0/2                     |                           |                          | 5/45 (11)            | 3/29 (10)               |
| Aortic repair                   | 4/19                    | 4/15                    | 0/6                    |                         | 2/3                        | 0/2                     |                           |                          | 10/45 (22)           | 5/29 (17)               |
| Aortic tortuosity               |                         |                         |                        |                         |                            |                         |                           |                          |                      | 1/15 (7)                |
| Arachnodactyly                  | 8/13                    | 8/15                    | 2/6                    | 0/1                     | 0/2                        | 1/2                     |                           |                          | 19/39 (49)           | 14/29 (48)              |
| Arterial aneurysm               |                         |                         |                        |                         |                            |                         |                           |                          |                      | 4/17 (24)               |
| Arterial tortuosity             | 3/5                     | 1/15                    | 1/1                    |                         | 2/2                        | 1/1                     |                           | 1/1                      | 9/25 (36)            | 8/20 (40)               |
| Artery dissection               |                         |                         |                        |                         |                            |                         |                           |                          |                      | 2/5 (40)                |
| Ascending aortic aneurysm       |                         |                         |                        |                         |                            |                         |                           |                          |                      | 2/17 (12)               |
| Astigmatism                     |                         | 1/15                    |                        |                         |                            |                         |                           |                          | 1/15 (7)             |                         |
| Atrial septal defect            |                         |                         |                        |                         |                            |                         |                           | 1/1                      | 1/1 (100)            | 1/18 (6)                |
| Atrophic scarring               |                         |                         |                        |                         |                            |                         |                           |                          |                      | 1/17 (6)                |
| Bicuspid aortic valve           |                         | 2/15                    |                        |                         |                            |                         | 1/3                       |                          | 3/18 (17)            | 2/25 (8)                |
| Blue sclerae                    |                         |                         |                        |                         |                            |                         |                           |                          |                      | 1/21 (5)                |
| Camptodactyly                   |                         |                         | 1/6                    |                         |                            |                         |                           | 1/1                      | 2/7 (29)             | 1/19 (0)                |
| Cataract                        |                         |                         | 1/6                    |                         |                            |                         |                           |                          | 1/6 (17)             | 0/14 (0)                |
| Cervical spine instability      |                         |                         |                        |                         |                            |                         |                           |                          |                      | 0/17 (0)                |
| Cleft palate                    | 0/13                    |                         |                        |                         |                            |                         |                           |                          | 0/13 (0)             | 4/22 (18)               |
| Club feet                       |                         | 5/15                    | 1/6                    | 0/1                     | 1/2                        | 0/2                     |                           |                          | 7/26 (27)            | 3/27 (11)               |
| Craniosynostosis                |                         |                         |                        |                         |                            |                         |                           |                          |                      | 0/19 (0)                |
| Defective scaring               |                         | 2/15                    | 1/6                    |                         |                            | 1/2                     |                           |                          | 4/23 (17)            |                         |
| Dolichocephaly                  | 0/13                    |                         |                        |                         |                            |                         | 1/3                       |                          | 1/16 (6)             | 6/18 (33)               |
| Dolichostenomelia               |                         |                         |                        |                         |                            |                         |                           |                          |                      | 10/20 (50)              |
| Downslanting palpebral fissures | 0/13                    | 10/15                   | 1/6                    |                         | 0/0                        |                         |                           | 1/1                      | 12/35 (34)           | 16/26 (62)              |
| Dural ectasia                   | 3/5                     | 1/6                     |                        |                         | 0/2                        | 1/1                     |                           |                          | 5/14 (36)            | 7/12 (58)               |
| Easy bruising                   |                         | 5/11                    |                        |                         | 0/2                        | 2/2                     |                           |                          | 5/15 (33)            | 11/29 (38)              |
| Ectopia lentis                  | 0/13                    |                         |                        |                         | 0/2                        |                         |                           |                          | 0/15 (0)             | 0/16 (0)                |
| Emphysema                       | 2/13                    |                         |                        |                         |                            |                         |                           |                          | 2/13 (15)            |                         |
| Excavation papillae             |                         | 1/15                    |                        |                         |                            |                         |                           |                          | 1/15 (7)             |                         |
| Flat cornea                     | 2/8                     |                         |                        |                         |                            |                         |                           |                          | 2/8 (25)             |                         |
| Fractures                       |                         |                         |                        |                         |                            |                         |                           |                          |                      | 2/15 (13)               |
| Glaucoma                        |                         |                         |                        |                         |                            |                         |                           |                          |                      | 2/16 (13)               |
| Hernia                          | 6/17                    | 10/15                   |                        |                         | 2/2                        | 1/2                     |                           | 1/1                      | 20/37 (54)           | 9/30 (30)               |
| High arched palate              | 9/15                    | 10/15                   | 2/6                    | 1/1                     | 1/2                        | 2/2                     | 1/3                       |                          | 26/44 (59)           | 10/10 (100)             |
| Hyperelastic skin               | 0/13                    |                         |                        |                         |                            | 2/2                     |                           |                          | 2/15 (13)            |                         |
| Hyperopia                       |                         | 1/15                    |                        |                         |                            |                         |                           |                          | 1/15 (7)             |                         |
| Hypertelorism                   |                         | 5/15                    |                        | 1/1                     |                            |                         |                           |                          | 6/16 (38)            | 10/28 (36)              |
| Inflammatory bowel disease      |                         |                         |                        |                         |                            |                         |                           |                          |                      | 1/15 (7)                |
| Joint dislocation               |                         |                         |                        |                         |                            |                         |                           |                          |                      | 4/22 (18)               |
| Joint hypermobility             | 10/15                   | 7/15                    | 4/6                    | 1/1                     | 2/3                        | 2/2                     | 3/3                       | 1/1                      | 30/46 (65)           | 22/31 (71)              |
| Lens opacity                    |                         | 1/15                    |                        |                         |                            |                         |                           |                          | 1/15 (7)             |                         |
| Malar hypoplasia                | 0/13                    |                         |                        |                         |                            |                         |                           |                          | 0/13 (0)             | 12/19 (63)              |
| MV insufficiency or prolaps     | 3/19                    | 7/10                    | 4/6                    | 1/1                     | 0/2                        | 2/2                     |                           |                          | 17/40 (43)           | 11/33 (33)              |
| Myopia                          |                         | 4/15                    | 3/6                    | 1/1                     |                            |                         |                           |                          | 8/22 (36)            | 16/26 (62)              |
| Osteo-arthritis                 |                         |                         |                        |                         |                            |                         |                           |                          |                      | 2/15 (13)               |
| Osteoporosis                    |                         |                         |                        |                         |                            |                         |                           |                          |                      | 1/11 (9)                |
| Pectus deformities              | 7/16                    | 9/15                    | 2/6                    | 1/1                     | 1/3                        | 1/2                     |                           | 1/1                      | 22/44 (50)           | 18/33 (54)              |
| Pes planus                      | 11/15                   | 8/15                    | 1/6                    |                         | 1/2                        | 0/2                     | 1/3                       |                          | 22/43 (51)           | 18/30 (60)              |
| Phlebitis                       | 2/18                    |                         |                        |                         |                            |                         |                           |                          | 2/18 (11)            |                         |
| Pneumothorax                    | 1/17                    |                         |                        |                         |                            |                         |                           |                          | 1/17 (6)             | 1/18 (6)                |
| Protrusio acetabuli             | 1/8                     |                         |                        |                         |                            |                         |                           |                          | 1/8 (13)             |                         |
| Retinal detachment              |                         | 1/15                    |                        |                         |                            |                         |                           |                          | 1/15 (7)             | 1/16 (6)                |
| Retrognathia                    | 2/13                    | 11/15                   | 2/6                    | 1/1                     | 2/2                        |                         |                           | 1/1                      | 19/38 (50)           | 18/29 (62)              |
| Scoliosis                       | 4/15                    | 5/15                    | 1/6                    | 1/1                     | 3/3                        | 2/2                     | 1/3                       | 1/1                      | 18/46 (39)           | 12/30 (40)              |
| Spondylolisthesis               | 1/7                     |                         |                        |                         |                            |                         |                           |                          | 1/7 (14)             | 1/11 (9)                |
| Strabismus                      |                         |                         | 1/6                    | 1/1                     |                            |                         |                           |                          | 2/7 (29)             | 4/20 (20)               |
| Striae                          | 8/15                    | 3/15                    | 1/6                    |                         | 0/2                        | 1/2                     |                           |                          | 13/40 (33)           | 11/28 (39)              |
| Tall stature                    | 8/19                    | 11/15                   | 0/1                    |                         | 2/2                        | 1/2                     |                           |                          | 22/39 (56)           |                         |
| Thin, translucent skin          |                         |                         |                        |                         |                            |                         |                           |                          |                      | 6/21 (29)               |
| Tooth enamel defect             |                         |                         |                        | 1/1                     |                            |                         |                           |                          | 1/1 (100)            | 2/15 (13)               |
