# Supplementary material for: A mutation update on the LDS‐associated genes TGFB2/3 and SMAD2/3
Source: PubMed Central journal article supplement (PMC5947146; doi:10.1002/humu.23407), 2018-03-06
Supplement: HUMU-39-621-s003.pdf [file HUMU-39-621-s003.pdf]

**Supplementary Table S3:** Comparison of the clinical features between previously reported and newly identified *SMAD3* mutation patients.

|                                                    | (van de Laar, et al., 2011 ; van de Laar, et al., 2012) | (Wischmeijer, et al., 2013) | (Regalado, et al., 2011) | (Hilhorst-Hofstee, et al., 2013) | (Fitzgerald, et al., 2014) | (Mancens, et al., 2013) | (Aubart, et al., 2014) | (Burke, et al., 2015) | (Berthet, et al., 2015) | (Haller, et al., 2015) | (Blinc, et al., 2015) | (Zhang, et al., 2015) | (Schubert, et al., 2016) | (Nevidomskyye, et al., 2017) | (Garcia-Bermudez, et al., 2017) | (Courtois, et al., 2017) | Total literature (%) | Total current study (%) |
|----------------------------------------------------|---------------------------------------------------------|-----------------------------|--------------------------|----------------------------------|----------------------------|-------------------------|------------------------|-----------------------|-------------------------|------------------------|-----------------------|-----------------------|--------------------------|------------------------------|---------------------------------|--------------------------|----------------------|-------------------------|
| Abdominal aortic aneurysm                          | 4/33                                                    |                             | 2/42                     |                                  |                            |                         |                        |                       |                         |                        |                       |                       |                          |                              |                                 | 1/1                      | 7/76 (9)             |                         |
| Abnormal palate                                    | 15/28                                                   |                             |                          | 2/7                              |                            |                         |                        |                       | 1/1                     |                        |                       |                       |                          |                              |                                 | 0/1                      | 18/37 (49)           |                         |
| Abnormal uvula                                     | 13/25                                                   | 2/3                         | 1/8                      | 3/7                              |                            |                         |                        |                       |                         | 0/1                    |                       |                       |                          |                              |                                 | 0/1                      | 19/45 (42)           | 16/39 (41)              |
| Aneurysm(s) of cerebral arteries                   | 6/16                                                    |                             |                          |                                  |                            |                         |                        |                       |                         |                        |                       |                       |                          |                              |                                 | 0/1                      | 6/17 (35)            |                         |
| Aortic aneurysm                                    | 28/39                                                   | 4/7                         |                          | 5/8                              | 1/1                        | 1/1                     |                        |                       | 1/1                     | 0/2                    | 0/1                   |                       | 1/1                      |                              |                                 |                          | 41/61 (67)           | 17/33 (52)              |
| Aortic dissection/rupture                          | 13/39                                                   | 1/7                         | 13/42                    | 1/8                              |                            |                         | 13/50                  | 1/1                   | 1/1                     | 0/2                    | 0/2                   |                       |                          | 1/1                          |                                 |                          | 44/153 (29)          | 12/31 (39)              |
| Aortic surgery                                     |                                                         |                             |                          |                                  |                            |                         |                        |                       |                         |                        |                       |                       | 1/1                      |                              | 1/1                             | 1/1                      | 2/2 (100)            | 16/33 (49)              |
| Aortic tortuosity                                  | 10/26                                                   | 2/5                         |                          |                                  |                            | 1/1                     |                        |                       |                         |                        |                       | 1/1                   |                          |                              |                                 | 0/1                      | 14/34 (41)           | 4/23 (17)               |
| Arachnodactyly                                     | 13/33                                                   |                             | 0/8                      |                                  |                            |                         |                        |                       |                         |                        |                       |                       |                          |                              |                                 | 0/1                      | 13/42 (31)           | 9/32 (28)               |
| Arterial aneurysm                                  |                                                         |                             |                          |                                  |                            |                         |                        | 1/1                   |                         |                        | 1/1                   | 1/1                   |                          | 1/1                          |                                 | 1/1                      | 5/5 (100)            | 10/27 (37)              |
| Arterial tortuosity                                |                                                         |                             |                          | 3/5                              |                            |                         |                        |                       |                         |                        | 1/1                   |                       |                          |                              |                                 | 0/1                      | 4/6 (67)             | 12/26 (46)              |
| Arterial tortuosity of cerebral arteries           | 8/16                                                    |                             | 2/6                      |                                  |                            |                         |                        |                       |                         |                        |                       |                       |                          |                              |                                 |                          | 10/22 (45)           |                         |
| Arterial tortuosity of thoracic/abdominal arteries | 8/21                                                    |                             | 1/17                     |                                  |                            | 1/1                     |                        |                       |                         |                        |                       |                       |                          |                              |                                 |                          | 10/39 (26)           |                         |
| Artery dissection                                  |                                                         |                             |                          |                                  |                            |                         |                        |                       |                         |                        |                       |                       | 1/1                      | 1/1                          |                                 |                          | 2/2 (100)            | 2/3 (67)                |
| Atrial fibrillation                                | 8/33                                                    |                             |                          |                                  |                            |                         |                        |                       |                         |                        |                       |                       |                          |                              |                                 |                          | 8/33 (24)            |                         |
| Atrophic scars                                     |                                                         |                             | 1/8                      |                                  |                            |                         |                        |                       |                         |                        |                       |                       |                          |                              | 0/1                             | 0/1                      | 1/9 (11)             | 7/27 (26)               |
| Baldder/uterus/bowel prolapse                      | 7/17                                                    |                             |                          |                                  |                            |                         |                        |                       |                         |                        |                       |                       |                          |                              |                                 |                          | 7/17 (41)            |                         |
| Bicuspid aortic valve                              |                                                         |                             |                          |                                  |                            |                         |                        |                       |                         |                        |                       |                       |                          |                              |                                 |                          |                      | 3/28 (11)               |
| Blue sclerae                                       |                                                         |                             |                          |                                  |                            |                         |                        |                       |                         |                        |                       |                       |                          |                              | 0/1                             | 0/1                      | 0/1 (0)              | 2/29 (7)                |
| Camptodactyly                                      | 4/30                                                    |                             | 1/8                      |                                  |                            |                         |                        |                       |                         |                        |                       |                       |                          |                              | 0/1                             | 0/1                      | 5/39 (13)            | 3/29 (10)               |
| Cataract                                           |                                                         |                             |                          |                                  |                            |                         |                        |                       |                         |                        |                       |                       |                          |                              | 0/1                             | 0/1                      | 0/1 (0)              | 4/19 (21)               |
| Cervical spine instability                         |                                                         |                             |                          |                                  |                            |                         |                        |                       |                         |                        |                       |                       |                          |                              | 0/1                             | 0/1                      | 0/1 (0)              | 1/22 (5)                |
| Chronic fatigue                                    | 11/28 (39)                                              |                             |                          |                                  |                            |                         |                        |                       |                         |                        |                       |                       |                          |                              |                                 |                          | 11/28 (39)           |                         |
| Cleft palate                                       |                                                         |                             |                          |                                  |                            |                         |                        |                       |                         |                        |                       |                       |                          | 0/1                          | 0/1                             | 0/1                      | 0/2 (0)              | 0/34 (0)                |
| Club foot                                          |                                                         |                             |                          |                                  |                            |                         |                        |                       |                         |                        |                       |                       |                          |                              | 0/1                             | 0/1                      | 0/1 (0)              | 4/31 (13)               |
| Congenital heart disease                           | 3/33                                                    |                             |                          |                                  |                            |                         |                        |                       |                         |                        |                       |                       |                          |                              |                                 |                          | 3/33 (11)            | 0/26 (0)                |
| Craniosynostosis                                   |                                                         |                             |                          |                                  |                            |                         |                        |                       |                         |                        |                       |                       |                          | 0/1                          | 0/1                             | 0/1                      | 0/2 (0)              | 1/31 (3)                |
| Delayed wound healing                              |                                                         |                             |                          |                                  |                            |                         |                        |                       |                         |                        |                       |                       |                          |                              | 0/1                             | 0/1                      | 0/1 (0)              | 1/28 (4)                |
| Dental malocclusion                                | 8/15                                                    |                             | 0/8                      |                                  |                            |                         |                        |                       |                         |                        |                       |                       |                          |                              |                                 |                          | 8/23 (35)            |                         |
| Dolichocephaly                                     |                                                         |                             |                          |                                  |                            |                         |                        |                       |                         |                        |                       |                       |                          |                              | 0/1                             | 0/1                      | 0/1 (0)              | 9/28 (32)               |
| Dolichostenomelia                                  | 7/33                                                    |                             |                          |                                  |                            |                         |                        |                       |                         |                        |                       |                       |                          |                              | 0/1                             | 0/1                      | 7/33 (21)            | 6/29 (20)               |
| Downslant palpebral fissures                       |                                                         |                             |                          |                                  |                            |                         |                        |                       |                         |                        |                       |                       |                          | 0/1                          | 0/1                             | 0/1                      | 0/2 (0)              | 11/27 (41)              |
| Dural ectasia                                      | 7/?                                                     | 1/2                         | 1/8                      |                                  |                            |                         |                        |                       |                         |                        |                       |                       |                          |                              |                                 |                          | 9/?                  | 8/16 (50)               |
| Easy bruising                                      | 10/28                                                   | 1/5                         | 2/8                      |                                  |                            |                         |                        |                       |                         |                        |                       |                       |                          |                              | 1/1                             | 1/1                      | 14/42 (33)           | 12/29 (41)              |
| Ectopia lentis                                     |                                                         |                             |                          |                                  |                            |                         |                        |                       |                         |                        |                       |                       |                          |                              | 0/1                             | 0/1                      | 0/1 (0)              | 0/19 (0)                |
| Eosinophilic esophagitis                           |                                                         |                             |                          |                                  |                            |                         |                        |                       |                         |                        |                       |                       |                          |                              | 0/1                             | 0/1                      | 0/1 (0)              | 0/12 (0)                |
| Exotropia                                          |                                                         |                             |                          |                                  |                            |                         |                        |                       |                         |                        |                       |                       |                          |                              | 0/1                             | 0/1                      | 0/1 (0)              | 1/28 (4)                |
| Food allergy                                       |                                                         |                             |                          |                                  |                            |                         |                        |                       |                         |                        |                       |                       |                          |                              | 1/1                             | 1/1                      | 1/1 (100)            | 3/15 (20)               |
| Fractures                                          |                                                         |                             |                          |                                  |                            |                         |                        |                       |                         |                        |                       |                       |                          |                              | 0/1                             | 0/1                      | 0/1 (0)              | 7/26 (27)               |
| Genu Valgum                                        |                                                         | 1/5                         |                          |                                  |                            |                         |                        |                       |                         |                        |                       |                       |                          |                              |                                 |                          | 1/5 (20)             |                         |
| Glaucoma                                           |                                                         |                             |                          |                                  |                            |                         |                        |                       |                         |                        |                       |                       |                          |                              | 0/1                             | 0/1                      | 0/1 (0)              | 1/18 (6)                |
| Hernia                                             | 17/40                                                   | 2/5                         | 4/8                      | 2/7                              |                            | 1/1                     |                        |                       |                         |                        |                       |                       |                          |                              | 0/1                             | 0/1                      | 26/62 (42)           | 11/29 (38)              |
| Hiatus hernia                                      |                                                         | 1/5                         |                          |                                  |                            |                         |                        |                       |                         |                        |                       |                       |                          |                              |                                 |                          | 1/5 (20)             |                         |
| High arched palate                                 |                                                         |                             |                          |                                  |                            |                         |                        |                       |                         |                        |                       |                       |                          |                              |                                 |                          |                      | 2/3 (67)                |
| Hypertelorism                                      | 10/32                                                   | 1/5                         | 0/8                      | 2/7                              |                            |                         |                        |                       |                         | 0/1                    |                       |                       |                          | 0/1                          | 0/1                             | 0/1                      | 13/55 (24)           | 17/34 (50)              |
| Inflammatory bowel disease                         |                                                         |                             |                          |                                  |                            |                         |                        |                       |                         |                        |                       |                       |                          |                              | 0/1                             | 0/1                      | 0/1 (0)              | 0/19 (0)                |
| Intervertebral disc degeneration                   | 34/37                                                   | 2/3                         | 2/25                     | 4/6                              |                            |                         |                        |                       |                         |                        |                       |                       |                          |                              |                                 |                          | 42/71 (59)           |                         |
| Intracranial aneurysm or subarachnoid hemorrhage   |                                                         |                             | 4/42                     |                                  |                            |                         |                        |                       |                         |                        |                       |                       |                          |                              |                                 |                          | 4/42 (10)            |                         |
| Joint dislocation                                  |                                                         |                             |                          |                                  |                            |                         |                        |                       |                         |                        |                       |                       |                          |                              | 0/1                             | 0/1                      | 0/2 (0)              | 4/26 (15)               |
| Joint laxity                                       | 3/31                                                    |                             | 4/8                      | 1/7                              |                            | 0/1                     | 4/23                   |                       |                         |                        |                       |                       | 1/1                      |                              | 1/1                             | 1/1                      | 14/72 (19)           | 22/39 (56)              |

|                                                          | (van de Laar, et al., 2011 ; van de Laar, et al., 2012) | (Wischmeijer, et al., 2013) | (Regalado, et al., 2011) | (Hilhorst-Hofstee, et al., 2013) | (Fitzgerald, et al., 2014) | (Martens, et al., 2013) | (Aubart, et al., 2014) | (Burke, et al., 2015) | (Berthet, et al., 2015) | (Haller, et al., 2015) | (Blinc, et al., 2015) | (Zhang, et al., 2015) | (Schubert, et al., 2016) | (Nevidomskýte, et al., 2017) | (Garcia-Bermudez, et al., 2017) | (Courtois, et al., 2017) | Total literature (%) | Total current study (%) |
|----------------------------------------------------------|---------------------------------------------------------|-----------------------------|--------------------------|----------------------------------|----------------------------|-------------------------|------------------------|-----------------------|-------------------------|------------------------|-----------------------|-----------------------|--------------------------|------------------------------|---------------------------------|--------------------------|----------------------|-------------------------|
| Learning difficulties                                    |                                                         |                             |                          | 3/7                              |                            |                         |                        |                       |                         |                        |                       |                       |                          |                              |                                 |                          | 3/7 (43)             |                         |
| Left ventricular hypertrophy                             | 6/33                                                    |                             |                          |                                  | 1/1                        |                         |                        |                       |                         |                        |                       |                       |                          |                              |                                 |                          | 7/34 (21)            |                         |
| Malar Hypoplasia                                         |                                                         |                             | 3/8                      |                                  |                            |                         |                        |                       |                         |                        |                       |                       |                          |                              |                                 | 0/1                      | 3/9 (33)             | 11/32 (34)              |
| Meniscal lesions                                         | 7/25                                                    |                             |                          |                                  |                            |                         |                        |                       |                         |                        |                       |                       |                          |                              |                                 |                          | 7/25 (28)            |                         |
| Mitral valve anomalies                                   | 18/36                                                   | 2/5                         | 4/23                     | 0/8                              | 1/1                        |                         |                        |                       |                         |                        |                       |                       |                          |                              |                                 |                          | 25/73 (34)           | 9/31 (29)               |
| Myopia                                                   |                                                         |                             |                          |                                  |                            |                         |                        |                       |                         |                        |                       |                       |                          |                              |                                 | 0/1                      | 0/1 (0)              | 10/29 (35)              |
| Nasal polyps                                             |                                                         |                             |                          |                                  |                            |                         |                        |                       |                         |                        |                       |                       |                          |                              |                                 |                          |                      | 0/4 (0)                 |
| Osteoarthritis facet and/or uncovertebral joints (spine) | 20/26                                                   |                             |                          |                                  |                            |                         | 17/20                  |                       |                         |                        |                       |                       |                          |                              |                                 |                          | 37/46 (80)           |                         |
| Osteoarthritis feet/ankle                                | 8/26                                                    |                             |                          | 1/6                              |                            |                         |                        |                       |                         |                        |                       |                       |                          |                              |                                 |                          | 9/32 (28)            |                         |
| Osteoarthritis hand/wrist                                | 14/26                                                   |                             |                          | 2/6                              |                            |                         |                        |                       |                         |                        |                       |                       |                          |                              |                                 |                          | 16/32 (50)           |                         |
| Osteoarthritis hip                                       | 4/26                                                    |                             |                          | 2/6                              |                            |                         |                        |                       |                         |                        |                       |                       |                          |                              |                                 |                          | 6/32 (19)            |                         |
| Osteoarthritis in one or more joints                     | 25/26                                                   | 0/2                         | 7/25                     | 2/6                              |                            |                         | 13/14                  | 1/1                   |                         |                        |                       | 1/1                   |                          |                              |                                 | 0/1                      | 49/76 (64)           | 16/25 (64)              |
| Osteoarthritis knee                                      | 13/26                                                   |                             |                          | 1/6                              |                            |                         |                        |                       |                         |                        |                       |                       |                          |                              |                                 |                          | 14/32 (44)           |                         |
| Osteochondritis dissecans                                | 14/25                                                   |                             |                          | 0/6                              |                            |                         | 1/23                   |                       |                         |                        |                       |                       |                          |                              |                                 |                          | 15/54 (28)           |                         |
| Osteoporosis                                             |                                                         |                             |                          |                                  |                            |                         |                        |                       |                         |                        |                       |                       |                          |                              |                                 | 0/1                      | 0/1 (0)              | 6/17 (35)               |
| Painful joints                                           | 23/27                                                   |                             |                          |                                  |                            |                         |                        |                       |                         |                        |                       |                       |                          |                              |                                 |                          | 23/27 (85)           |                         |
| Patent ductus arteriosus                                 |                                                         |                             |                          |                                  |                            |                         |                        |                       |                         |                        |                       |                       |                          |                              |                                 |                          |                      | 1/27 (4)                |
| Pectus deformity                                         | 12/33                                                   | 1/5                         | 1/8                      | 0/7                              |                            |                         |                        |                       | 1/1                     |                        |                       |                       |                          | 1/1                          | 0/1                             | 0/1                      | 16/56 (29)           | 14/34 (41)              |
| Pes planus                                               | 30/33                                                   | 4/5                         | 3/8                      |                                  |                            |                         |                        |                       |                         |                        |                       |                       |                          |                              |                                 | 0/1                      | 37/47 (79)           | 25/34 (73)              |
| Pneumothorax                                             |                                                         |                             |                          |                                  |                            |                         |                        |                       |                         |                        |                       |                       |                          |                              | 0/1                             | 0/1                      | 0/2 (0)              | 1/29 (3)                |
| Premature teeth loss                                     |                                                         | 1/5                         |                          |                                  |                            |                         |                        |                       |                         |                        |                       |                       |                          |                              |                                 |                          | 1/5 (20)             |                         |
| Proptosis                                                |                                                         |                             |                          |                                  |                            |                         |                        |                       |                         |                        |                       |                       |                          |                              |                                 | 0/1                      | 0/1 (0)              | 2/22 (9)                |
| Protrusio acetabulae                                     | 7/20                                                    |                             |                          |                                  |                            |                         |                        |                       |                         |                        |                       |                       |                          |                              |                                 |                          | 7/20 (35)            |                         |
| Retinal detachment                                       |                                                         |                             |                          |                                  |                            |                         |                        |                       |                         |                        |                       |                       |                          |                              |                                 | 0/1                      | 0/1 (0)              | 1/26 (4)                |
| Retrognathia                                             |                                                         |                             |                          |                                  |                            |                         |                        |                       |                         |                        |                       |                       |                          |                              |                                 | 0/1                      | 0/1 (0)              | 6/29 (21)               |
| Scoliosis                                                | 22/36                                                   |                             | 1/8                      | 5/7                              |                            |                         | 9/18                   |                       |                         | 2/2                    |                       |                       |                          |                              | 0/1                             | 0/1                      | 39/74 (53)           | 21/38 (55)              |
| Severe allergy                                           |                                                         |                             |                          |                                  |                            |                         |                        |                       |                         |                        |                       |                       |                          |                              |                                 | 0/1                      |                      | 3/23 (13)               |
| Spondylolysis/spondylolisthesis                          | 10/26                                                   |                             |                          | 1/7                              |                            |                         |                        |                       |                         |                        |                       |                       |                          |                              |                                 | 0/1                      | 11/34 (32)           | 8/27 (30)               |
| Striae                                                   | 17/32                                                   | 2/5                         | 0/8                      | 1/7                              |                            |                         |                        |                       |                         | 1/2                    |                       |                       |                          |                              |                                 | 1/1                      | 22/55 (40)           | 5/28 (18)               |
| Sudden death                                             |                                                         | 1/7                         |                          |                                  |                            |                         | 15/50                  |                       |                         |                        |                       |                       |                          |                              |                                 |                          | 16/57 (28)           |                         |
| Tooth enamel defect                                      |                                                         |                             |                          |                                  |                            |                         |                        |                       |                         |                        |                       |                       |                          |                              |                                 | 0/1                      | 0/1 (0)              | 1/12 (8)                |
| Translucent skin                                         |                                                         |                             | 2/8                      |                                  |                            | 0/1                     |                        |                       |                         |                        |                       |                       |                          |                              |                                 | 1/1                      | 3/10 (30)            | 7/30 (23)               |
| Varices                                                  | 18/31                                                   |                             |                          | 1/7                              |                            |                         |                        |                       |                         |                        |                       |                       |                          |                              |                                 |                          | 19/38 (50)           |                         |
| Velvety skin                                             | 18/29                                                   |                             | 0/8                      | 1/7                              |                            | 0/1                     |                        |                       |                         |                        |                       |                       |                          |                              |                                 |                          | 19/45 (42)           |                         |
