# Supplementary material for: A mutation update on the LDS‐associated genes TGFB2/3 and SMAD2/3
Source: PubMed Central journal article supplement (PMC5947146; doi:10.1002/humu.23407), 2018-03-06
Supplement: HUMU-39-621-s004.pdf [file HUMU-39-621-s004.pdf]

**Supplementary Table S4:** Clinical features of all *TGFB3* patients reported so far.

| <b>Clinical feature</b>      | <b>Total (%)</b> |
|------------------------------|------------------|
| Hypertelorism                | 20/45 (45)       |
| Downslant palpebral fissures | 6/40 (15)        |
| Retrognathia                 | 10/20 (50)       |
| Ectopia Lentis               | 0/11 (0)         |
| Cataract                     | 1/11 (9)         |
| Exotropia                    | 0/10 (0)         |
| Myopia                       | 6/15 (40)        |
| Cleft Palate                 | 7/13 (54)        |
| Craniosynostosis             | 0/9 (0)          |
| Blue sclerae                 | 2/10 (20)        |
| Malar Hypoplasia             | 3/10 (30)        |
| Dolichocephaly               | 4/14 (29)        |
| Retinal detachment           | 0/9 (0)          |
| Glaucoma                     | 0/8 (0)          |
| Proptosis                    | 1/10 (10)        |
| Broad/bifid uvula            | 19/24 (79)       |
| Dolichostenomelia            | 5/13 (39)        |
| Joint hyperlaxity            | 21/26 (80)       |
| Club foot                    | 3/12 (25)        |
| Flat feet                    | 19/23 (83)       |
| Osteoporosis                 | 1/9 (11)         |
| Pectus deformity             | 13/20 (65)       |
| Cervical spine instability   | 1/10 (10)        |
| Scoliosis                    | 20/29 (69)       |
| Joint dislocation            | 4/11 (36)        |
| Arachnodactyly               | 18/45 (40)       |
| Campodactyly                 | 3/12 (25)        |
| Spondylolisthesis            | 2/10 (20)        |
| Osteo-arthritis              | 5/11 (46)        |
| Fractures                    | 1/9 (11)         |
| Thin, translucent skin       | 3/14 (21)        |
| Striae                       | 4/18 (22)        |
| Delayed wound healing        | 2/16 (13)        |
| Hernia                       | 9/17 (53)        |
| Dural ectasia                | 0/7 (0)          |
| Easy bruising                | 8/15 (53)        |
| Atrophic scarring            | 0/16 (0)         |
| Artery dissection            | 0/9 (0)          |
| Aortic dissection/rupture    | 5/16 (31)        |
| Aortic surgery               | 3/13 (23)        |
| Aortic root aneurysm         | 8/24 (33)        |
| Ascending aortic aneurysm    | 4/17 (24)        |
| Other aortic aneurysm        | 6/20 (30)        |
| Arterial aneurysm            | 2/11 (18)        |
| Aortic tortuosity            | 1/7 (14)         |
| Arterial tortuosity          | 1/8 (13)         |
| Mitral valve prolapse        | 6/15 (40)        |
| Bicuspid aortic valve        | 1/10 (10)        |
| Patent ductus arteriosus     | 0/9 (0)          |
| Atrial septal defect         | 1/11 (9)         |
| Pneumothorax                 | 1/11 (9)         |
| Tooth enamel defect          | 1/10 (10)        |
| Eosinophilic esophagitis     | 0/8 (0)          |
| Inflammatory bowel disease   | 1/9 (11)         |
| Food allergy                 | 1/10 (10)        |
| Severe allergy               | 0/9 (0)          |
| Nasal Polyps                 | 0/8 (0)          |
