# Supplementary material for: A mutation update on the LDS‐associated genes TGFB2/3 and SMAD2/3
Source: PubMed Central journal article supplement (PMC5947146; doi:10.1002/humu.23407), 2018-03-06
Supplement: HUMU-39-621-s005.pdf [file HUMU-39-621-s005.pdf]

**Supplementary Table S5:** Clinical features of all *SMAD2* patients reported so far.

| <b>Clinical feature</b>      | <b>Total (%)</b> |
|------------------------------|------------------|
| Hypertelorism                | 1/6 (17)         |
| Downslant palpebral fissures | 2/2 (100)        |
| Ectopia Lentis               | 0/2 (0)          |
| Cataract                     | 1/2 (50)         |
| Exotropia                    | 0/2 (0)          |
| Myopia                       | 0/2 (0)          |
| High arched Palate           | 5/7 (71)         |
| Cleft Palate                 | 0/2 (0)          |
| Blue sclerae                 | 1/1 (100)        |
| Malar Hypoplasia             | 1/1 (100)        |
| Dolichocephaly               | 1/1 (100)        |
| Broad/bifid uvula            | 1/7 (14)         |
| Dolichostenomelia            | 1/3 (33)         |
| Joint hyperlaxity            | 0/5 (0)          |
| Club foot                    | 0/1 (0)          |
| Flat feet                    | 3/5 (60)         |
| Pectus deformity             | 3/8 (38)         |
| Scoliosis                    | 4/9 (44)         |
| Arachnodactyly               | 3/6 (50)         |
| Camptodactyly                | 0/4 (0)          |
| Spondylolisthesis            | 0/1 (0)          |
| Osteo-arthritis              | 3/3 (100)        |
| Thin, translucent skin       | 0/5 (0)          |
| Striae                       | 3/7 (43)         |
| Delayed wound healing        | 0/1 (0)          |
| Hernia                       | 4/5 (80)         |
| Easy bruising                | 2/4 (50)         |
| Atrophic scarring            | 0/3 (0)          |
| Artery dissection            | 2/4 (50)         |
| Aortic dissection/rupture    | 0/4 (0)          |
| Aortic surgery               | 1/1 (100)        |
| Aortic root aneurysm         | 5/6 (83)         |
| Ascending aortic aneurysm    | 3/3 (100)        |
| Other aortic aneurysm        | 1/2 (50)         |
| Arterial aneurysm            | 1/3 (33)         |
| Aortic tortuosity            | 0/4 (0)          |
| Arterial tortuosity          | 1/4 (25)         |
| Mitral valve prolapse        | 2/4 (50)         |
| Bicuspid aortic valve        | 1/3 (33)         |
| Severe allergy               | 0/4 (0)          |
